# Supplementary material for: Synthesis, characterisation and antitubercular activities of a series of pyruvate-containing aroylhydrazones and their Cu-complexes
Source: Royal Society of Chemistry journal article supplement (doi:10.1039/c2dt30322a), 2012-01-01
Supplement: c2dt30322a.pdf [file c2dt30322a.pdf]

**SUPPORTING INFORMATION:**

**Synthesis, characterisation and antitubercular activities of a series of pyruvate-containing aroylhydrazones and their Cu-complexes**

Abeda Jamadar<sup>a</sup>, Anne-K. Duhme-Klair<sup>a\*</sup>, Kiranmayi Vemuri,<sup>b</sup> Manjula Sritharan<sup>b\*</sup>, Prasad Dandawate<sup>c</sup>, Subhash Padhye<sup>c\*</sup>

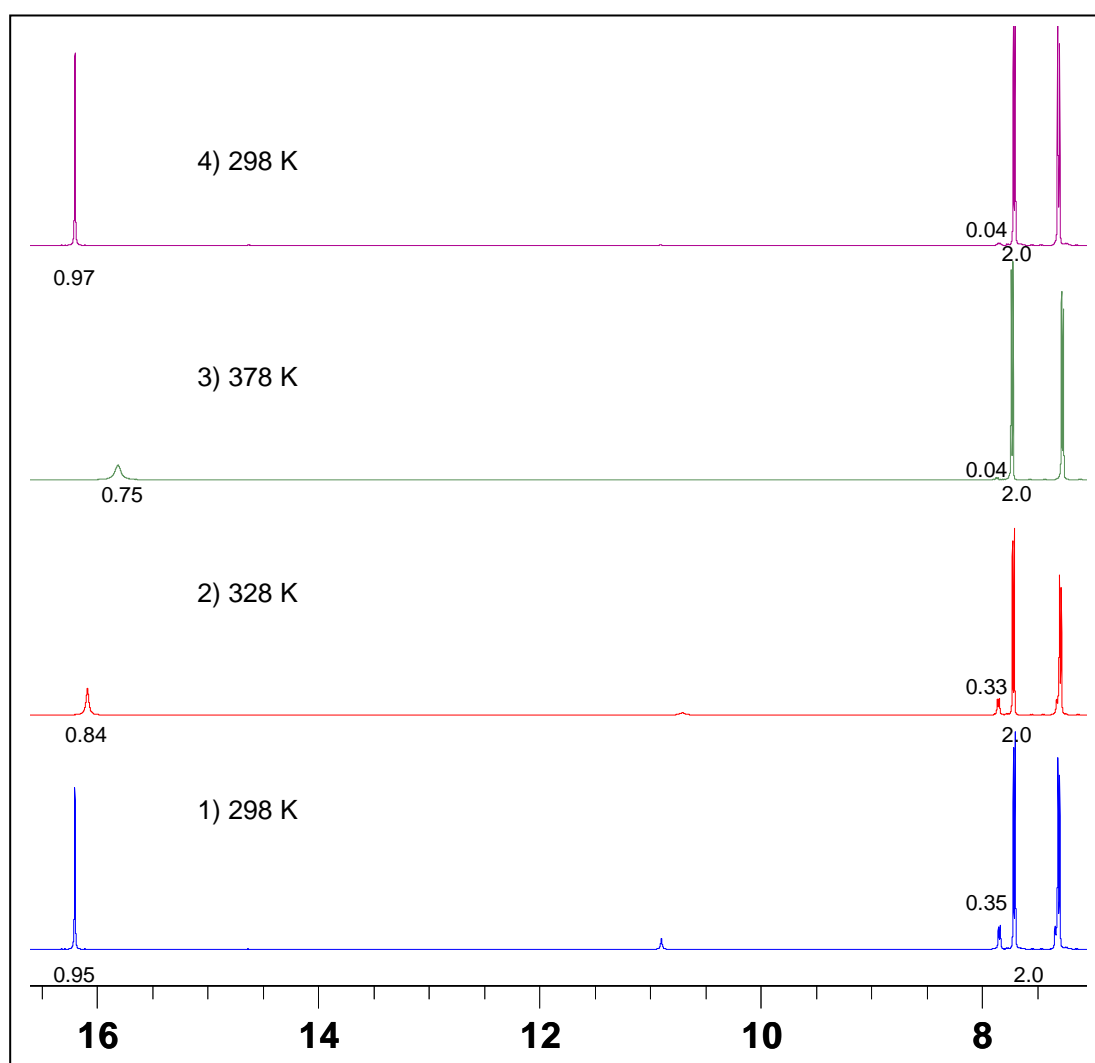

**Figure S1:** Proton NMR spectra of NaHL<sup>1</sup> recorded in DMSO-d<sub>6</sub> at 1) 298 K immediately after dissolving, 2) after heating to 328 K, 3) further heating to 378 K and c) after subsequent cooling to 298 K, with relative integrations indicated.

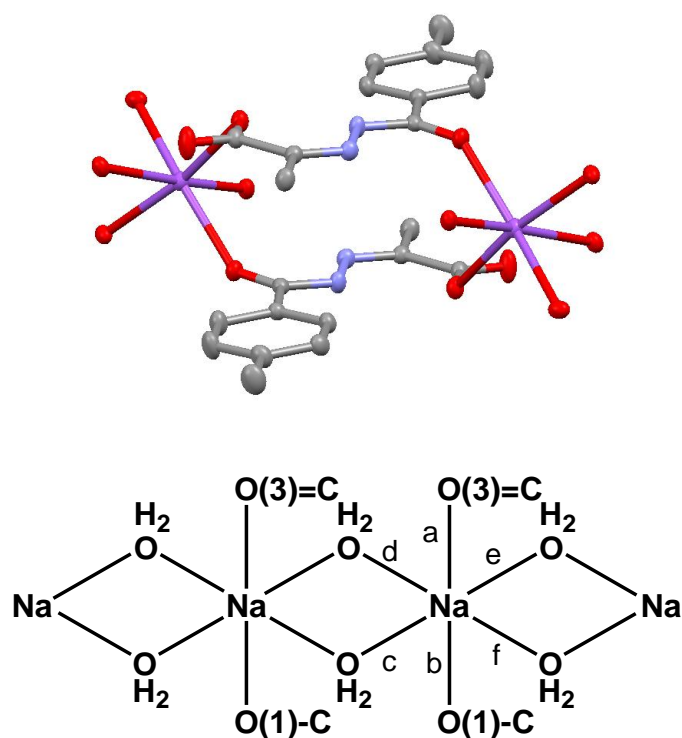

| Bonds  | NaHL <sup>1</sup> |
|--------|-------------------|
| a      | 2.3482(10)        |
| b      | 2.4222(11)        |
| c      | 2.3162(11)        |
| d      | 2.3952(11)        |
| e      | 2.4232(11)        |
| f      | 2.3459(11)        |
| Na-Na  | 3.3864(6)         |
| d-Na-c | 90.86(4)          |
| e-Na-f | 89.40(4)          |
| a-Na-b | 88.03(3)          |
| a-Na-f | 160.98(4)         |

**Figure S2:** Top: Mercury plot of a fragment of the packing diagram of **NaHL<sup>1</sup> x 2 H<sub>2</sub>O**, illustrating Na-coordination (Na purple, O red, N blue, C grey, H omitted for clarity). Middle: Schematic illustration of the sodium coordination environment. Bottom: Associated bond lengths (/ $\text{\AA}$ ) and angles ( $^\circ$ ).

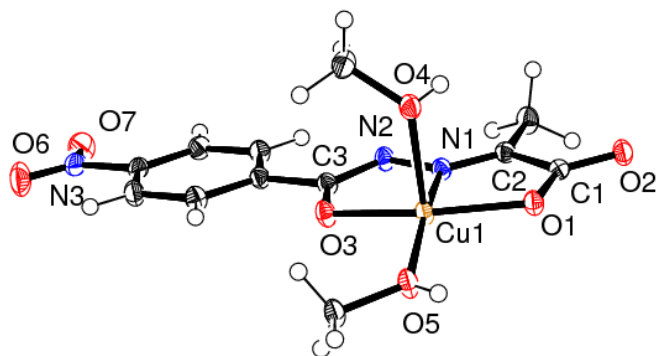

**Figure S3:** ORTEP plot (50% probability ellipsoids) of the asymmetric unit of  $[\text{Cu}(\text{L}^2)(\text{MeOH})_2]$ .

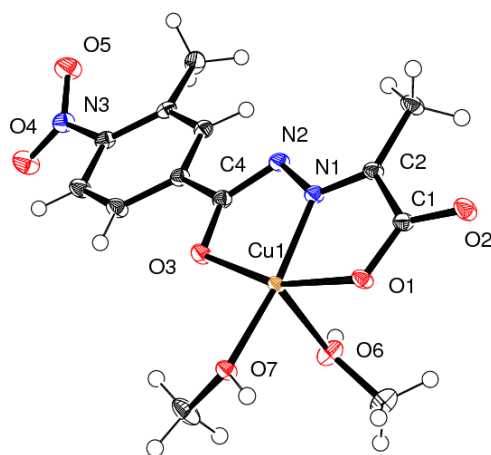

**Figure S4:** ORTEP plot (50% probability ellipsoids) of the asymmetric unit of  $[\text{Cu}(\text{L}^4)(\text{MeOH})_2]$ .

**Table S1.** Selected bond lengths ( $\text{\AA}$ ) and angles ( $^\circ$ ) for  $[\text{Cu}(\text{L}^2)(\text{MeOH})_2]$  and  $[\text{Cu}(\text{L}^4)(\text{MeOH})_2]$ .

|               | $[\text{Cu}(\text{L}^1)(\text{H}_2\text{O})_2]$ | $[\text{Cu}(\text{L}^2)(\text{MeOH})_2]$ | $[\text{Cu}(\text{L}^4)(\text{MeOH})_2]$ |
|---------------|-------------------------------------------------|------------------------------------------|------------------------------------------|
|               | complex 1:                                      |                                          |                                          |
| C(1)-O(1)     | 1.291(3)                                        | 1.2970(17)                               | 1.3008(17)                               |
| C(1)-O(2)     | 1.226(3)                                        | 1.2322(17)                               | 1.2296(18)                               |
| C(3)/(4)-O(3) | 1.301(3)                                        | 1.2862(17)                               | 1.2896(18)                               |
| C(2)-N(1)     | 1.286(3)                                        | 1.2852(18)                               | 1.2829(19)                               |
| C(3)/(4)-N(2) | 1.326(3)                                        | 1.3355(18)                               | 1.3305(19)                               |
| N(1)-N(2)     | 1.372(2)                                        | 1.3724(16)                               | 1.3791(16)                               |
| Cu(1)-N(1)    | 1.8988(19)                                      | 1.9128(12)                               | 1.9130(13)                               |

|                    |            |            |            |
|--------------------|------------|------------|------------|
| Cu(1)-O(1)         | 1.9877(16) | 2.0033(10) | 1.9988(12) |
| Cu(1)-O(3)         | 1.9873(16) | 1.9688(11) | 1.9725(11) |
| Cu(1)-O(solvent 1) | 1.958(2)   | 1.9285(11) | 1.9506(11) |
| Cu(1)-O(solvent 2) | 2.218(2)   | 2.2824(11) | 2.2138(14) |
| N(1)-Cu(1)-O(3)    | 79.98(7)   | 80.06(5)   | 79.88(5)   |
| N(1)-Cu(1)-O(1)    | 81.46(7)   | 81.87(5)   | 82.12(5)   |
| O(1)-Cu(1)-O(3)    | 161.11(7)  | 161.64(4)  | 160.24(5)  |

**Table S2.** Crystal data and summary of data collection and refinement details for **NaHL<sup>1</sup>**, **H<sub>2</sub>L<sup>8</sup>**, **[Cu(L<sup>1</sup>)(H<sub>2</sub>O)<sub>2</sub>]**, **[Cu(L<sup>2</sup>)(MeOH)<sub>2</sub>]** and **[Cu(L<sup>4</sup>)(MeOH)<sub>2</sub>]**.

| Compound                                     | <b>NaHL<sup>1</sup> x 2 H<sub>2</sub>O</b> | <b>H<sub>2</sub>L<sup>8</sup> x H<sub>2</sub>O</b> | <b>[Cu(L<sup>1</sup>)(H<sub>2</sub>O)<sub>2</sub>]</b> | <b>[Cu(L<sup>2</sup>)(MeOH)<sub>2</sub>]</b> | <b>[Cu(L<sup>4</sup>)(MeOH)<sub>2</sub>]</b> |
|----------------------------------------------|--------------------------------------------|----------------------------------------------------|--------------------------------------------------------|----------------------------------------------|----------------------------------------------|
| Empirical formula                            | C11H15N2NaO5                               | C8H10N4O4                                          | C11H14CuN2O5                                           | C12H15CuN3O7                                 | C13H17CuN3O7                                 |
| Formula weight                               | 278.24                                     | 226.20                                             | 317.78                                                 | 376.81                                       | 390.84                                       |
| Temperature / K                              | 110                                        | 110                                                | 110                                                    | 110                                          | 110                                          |
| Crystal system                               | Rhombohedral                               | Triclinic                                          | Triclinic                                              | Monoclinic                                   | monoclinic                                   |
| Space group                                  | R-3                                        | P-1                                                | P-1                                                    | P2(1)/n                                      | P2 <sub>1</sub> /n                           |
| Unit cell dimensions                         | a = 30.7555(9) Å<br>α = 90°                | a = 8.1680(5) Å<br>α = 109.642(7)°                 | a = 7.3879(9) Å<br>α = 93.602(2)°                      | a = 7.8471(4) Å<br>α = 90°                   | a = 10.159(3) Å<br>α = 90.00°                |
|                                              | b = 30.7555(9) Å<br>β = 90°                | b = 8.2337(6) Å<br>β = 99.708(5)°                  | b = 11.4695(13) Å<br>β = 102.437(2)°                   | b = 17.0584(8) Å<br>β = 93.9220(10)°         | b = 14.1559(7) Å<br>β = 114.11(3)°           |
|                                              | c = 7.3013(4) Å<br>γ = 120°                | c = 8.5815(6) Å<br>γ = 110.471(6)°                 | c = 15.3898(18) Å<br>γ = 103.124(2)°                   | c = 11.0122(5) Å<br>γ = 90°                  | c = 11.895(2) Å<br>γ = 90.00°                |
| Volume / Å <sup>3</sup>                      | 5981.0(4) Å <sup>3</sup>                   | 481.70(6)                                          | 1231.6(3) Å <sup>3</sup>                               | 1470.63(12) Å <sup>3</sup>                   | 1561.3(5)                                    |
| Z                                            | 18                                         | 2                                                  | 4                                                      | 4                                            | 4                                            |
| Density (calculated)<br>/ Mg m <sup>-3</sup> | 1.390                                      | 1.560                                              | 1.714                                                  | 1.702                                        | 1.663                                        |
| Absorption coefficient<br>/ mm <sup>-1</sup> | 0.136                                      | 0.127                                              | 1.792                                                  | 1.527                                        | 1.441                                        |
| F(000)                                       | 2628                                       | 236                                                | 652                                                    | 772                                          | 804                                          |

|                                                 |                                        |                                                      |                                        |                                          |                                                      |
|-------------------------------------------------|----------------------------------------|------------------------------------------------------|----------------------------------------|------------------------------------------|------------------------------------------------------|
| Crystal size / mm <sup>3</sup>                  | 0.17 x 0.15 x 0.10                     | 0.21 x 0.13 x 0.05                                   | 0.19 x 0.14 x 0.07                     | 0.16 x 0.09 x 0.04                       | 0.20 x 0.08 x 0.04                                   |
| Theta range for data collection                 | 1.32 to 28.30°                         | 2.92 to 27.56°                                       | 1.84 to 28.33°                         | 2.20 to 28.30°                           | 5.76 to 64.22°                                       |
| Index ranges                                    | -40<=h<=40,<br>-40<=k<=40,<br>-9<=l<=9 | -10 ≤ h ≤ 7,<br>-10 ≤ k ≤ 10,<br>-11 ≤ l ≤ 11        | -9<=h<=9,<br>-15<=k<=15,<br>-20<=l<=19 | -10<=h<=10,<br>-22<=k<=22,<br>-14<=l<=14 | -15 ≤ h ≤ 15,<br>-21 ≤ k ≤ 20,<br>-16 ≤ l ≤ 17       |
| Reflections collected                           | 20886                                  | 4178                                                 | 10913                                  | 15054                                    | 13154                                                |
| Independent reflections                         | 3303<br>[R(int) = 0.0331]              | 2229<br>[R(int) = 0.0192]                            | 5970<br>[R(int) = 0.0181]              | 3660<br>[R(int) = 0.0178]                | 4881<br>[R(int) = 0.0235]                            |
| Data / restraints / parameters                  | 3303 / 0 / 194                         | 2229 / 0 / 162                                       | 5970 / 2 / 371                         | 3660 / 0 / 219                           | 4881 / 0 / 229                                       |
| Goodness-of-fit on F <sup>2</sup>               | 1.091                                  | 1.089                                                | 1.047                                  | 1.072                                    | 1.058                                                |
| Final R indices<br>[I>2sigma(I)]                | R1 = 0.0386,<br>wR2 = 0.1026           | R <sub>1</sub> = 0.0414,<br>wR <sub>2</sub> = 0.1063 | R1 = 0.0379,<br>wR2 = 0.0982           | R1 = 0.0255,<br>wR2 = 0.0695             | R <sub>1</sub> = 0.0300,<br>wR <sub>2</sub> = 0.0682 |
| R indices (all data)                            | R1 = 0.0513,<br>wR2 = 0.1192           | R <sub>1</sub> = 0.0532,<br>wR <sub>2</sub> = 0.1142 | R1 = 0.0471,<br>wR2 = 0.1048           | R1 = 0.0276,<br>wR2 = 0.0709             | R <sub>1</sub> = 0.0377,<br>wR <sub>2</sub> = 0.0723 |
| Largest diff. peak and hole / e.Å <sup>-3</sup> | 0.470 and -0.282                       | 0.296 and -0.259                                     | 0.982 and -0.728                       | 0.454 and -0.338                         | 0.466 and -0.397                                     |

York - Chemistry - Mass Spectrometry Service Report

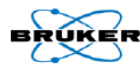

*CuNP4Me*  
**[Cu(L1)(H2O)2]**

Analysis Information

Analysis Filename akdk34144aj\_1-f,2\_01\_33268.d  
Method 800p.m  
Submission Name akdk34144aj  
Instrument micrOTOF  
ESI Positive

Acquisition Date

10/01/2012 12:50:45

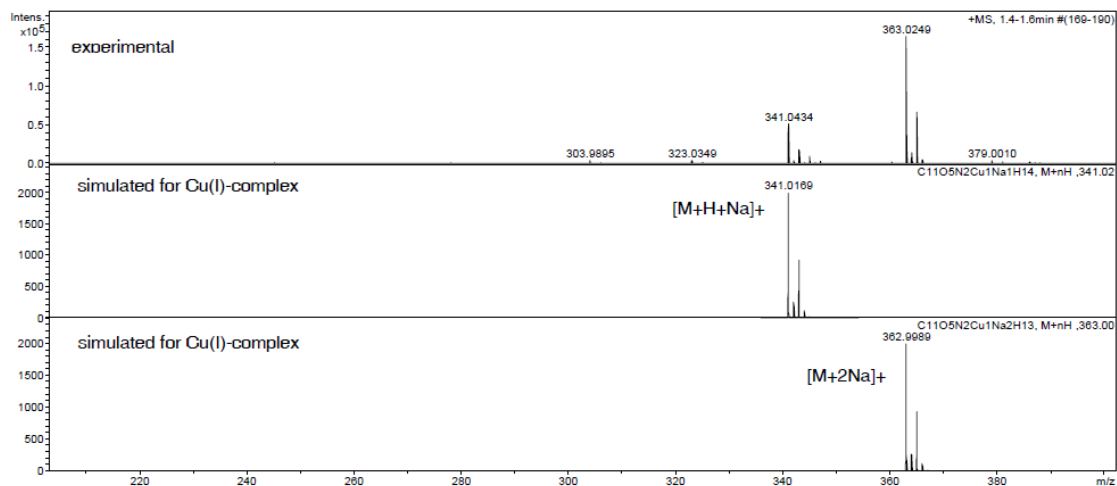

York - Chemistry - Mass Spectrometry Service Report

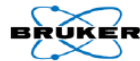

*CuNP4NO2*  
**[Cu(L2)(H2O)2]**

Analysis Information

Analysis Filename akdk34224aj\_1-c,9\_01\_33385.d  
Method 800p.m  
Submission Name akdk34224aj  
Instrument micrOTOF  
ESI Positive

Acquisition Date

13/01/2012 11:14:24

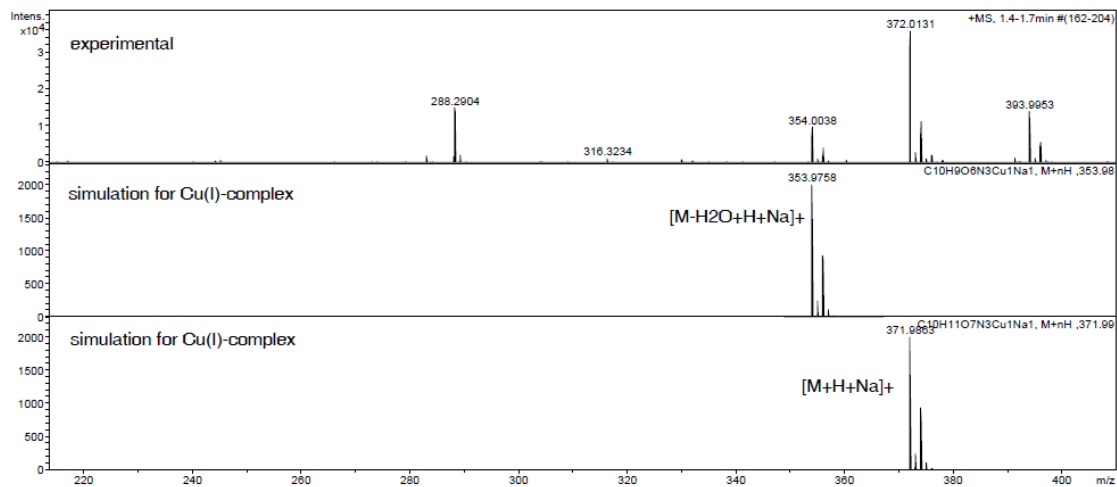

York - Chemistry - Mass Spectrometry Service Report

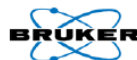

*CuNP4 tert*  
**[Cu(L3)(H2O)2]**

Analysis Information

Analysis Filename akdk29769aj\_1-c\_2\_01\_26365.d  
Method 400p.m  
Submission Name akdk29769aj  
Instrument micrOTOF  
ESI Positive

Acquisition Date

16/02/2011 12:33:08

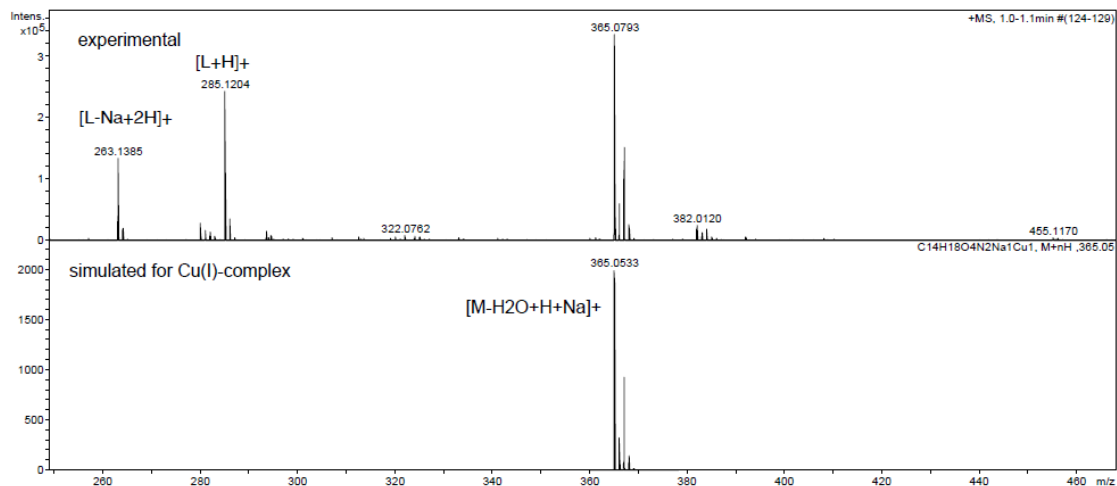

York - Chemistry - Mass Spectrometry Service Report

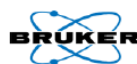

*CuNP3Me4NO2*  
**[Cu(L4)(H2O)2]**

Analysis Information

Analysis Filename akdk34173aj\_1-d\_2\_01\_33312.d  
Method 800p.m  
Submission Name akdk34173aj  
Instrument micrOTOF  
ESI Positive

Acquisition Date

11/01/2012 15:17:41

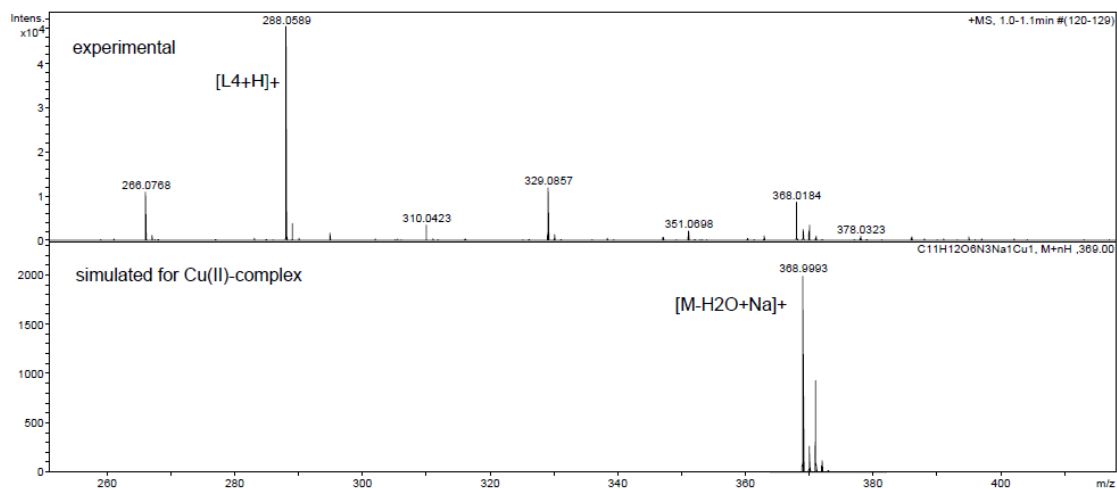



York - Chemistry - Mass Spectrometry Service Report

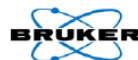

*CuNP4CF3*  
[Cu(L5)(H2O)2]

Analysis Information

Analysis Filename akdk34175aj\_infusion\_1-d\_4\_01\_33324.d  
Method 800p.m  
Submission Name akdk34175aj\_infusion  
Instrument micrOTOF  
ESI Positive

Acquisition Date

11/01/2012 18:02:31

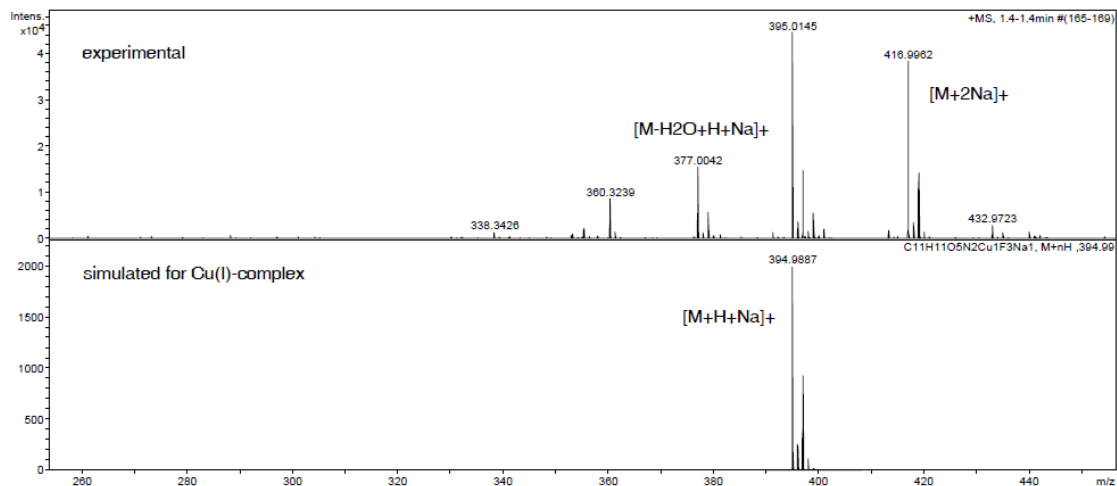

York - Chemistry - Mass Spectrometry Service Report

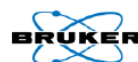

*CuNP3F*  
[Cu(L6)(H2O)2]

Analysis Information

Analysis Filename akdk34174aj\_infusion\_1-d\_3\_01\_33323.d  
Method 800p.m  
Submission Name akdk34174aj\_infusion  
Instrument micrOTOF  
ESI Positive

Acquisition Date

11/01/2012 17:52:35

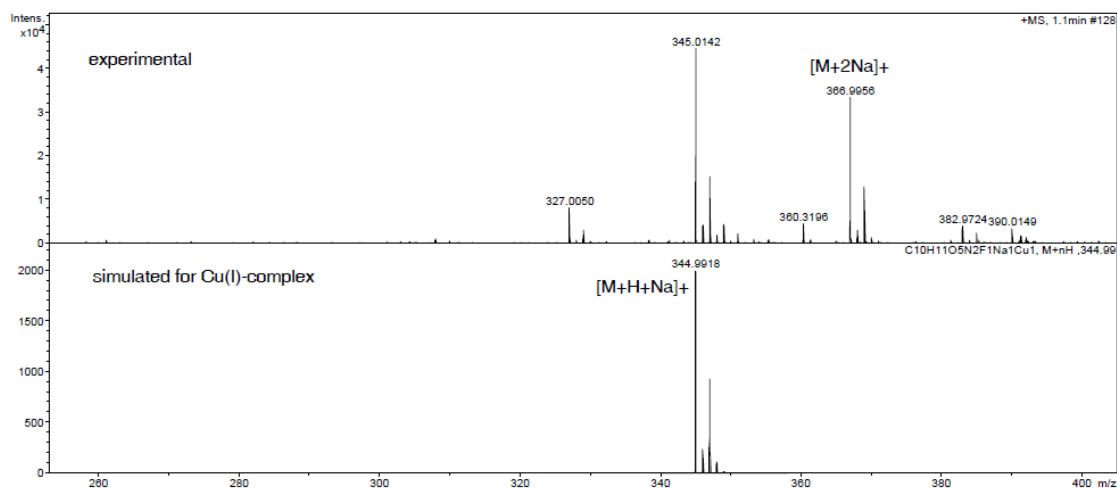

York - Chemistry - Mass Spectrometry Service Report



*CuNP3OH*  
[Cu(L7)(H2O)2]

Analysis Information

Analysis Filename akdk29752aj\_1-a,6\_01\_26345.d  
Method 400p.m  
Submission Name akdk29752aj  
Instrument micrOTOF  
ESI Positive

Acquisition Date

15/02/2011 17:48:46

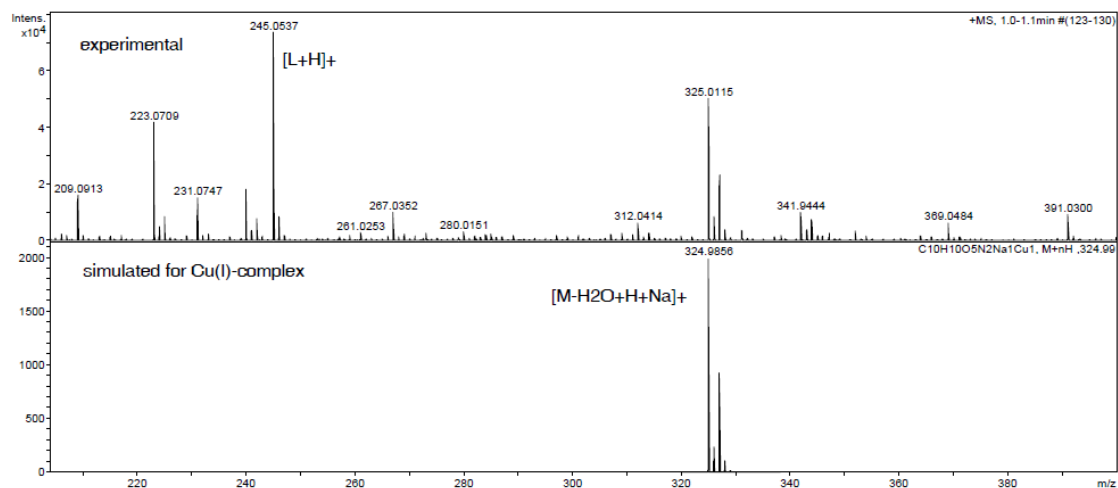

York - Chemistry - Mass Spectrometry Service Report

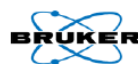

*CuNPP2H*  
[Cu(L8)(H2O)2]

Analysis Information

Analysis Filename akdk34227aj\_1-d,3\_01\_33397.d  
Method 800p.m  
Submission Name akdk34227aj  
Instrument micrOTOF  
ESI Positive

Acquisition Date

13/01/2012 12:34:34

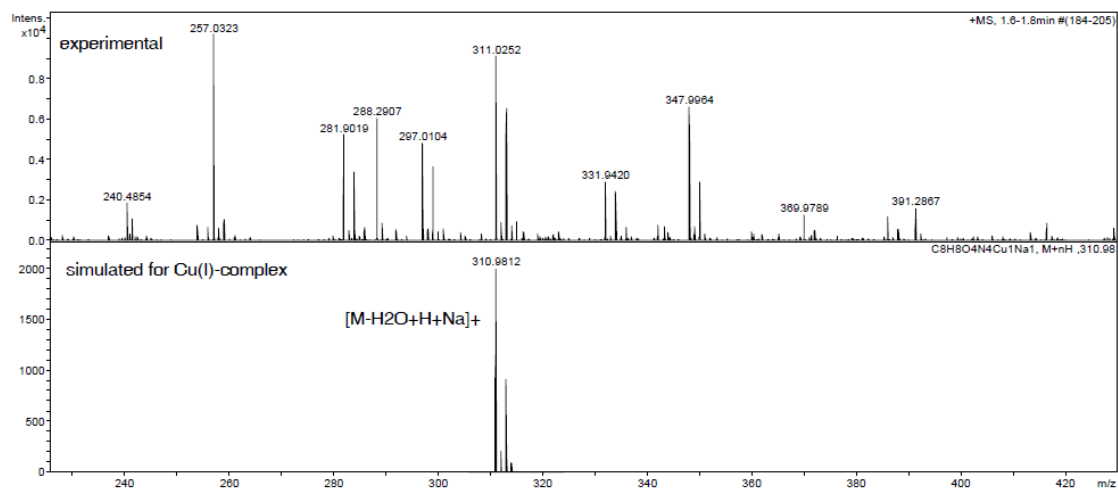

Figure S5: ESI mass spectra of copper complexes [Cu(L<sup>1</sup>)(H<sub>2</sub>O)<sub>2</sub>]-[Cu(L<sup>8</sup>)(H<sub>2</sub>O)<sub>2</sub>].
